# Supplementary material for: Depressive and Anxiety Symptoms Predict Health-Related Quality of Life More Than Cognitive Impairment After Minor Stroke or Transient Ischemic Attack: A Hierarchical Regression Analysis
Source: Research Square preprint supplement (doi:10.21203/rs.3.rs-8864143/v1), 2026-02-19
Supplement: Supplementary file 1 [file 10e677d1ffad6e19ce1d5424.docx]

Table S1. Comparison of psychopathological, cognitive, and quality‑of‑life outcomes (cases vs. contro

| **Outcome measure** | **Cases (n=90)** | **Controls (n=92)** | ***p* value** | **Cohen’s *d*** | **OR (95% CI)†** |
| --- | --- | --- | --- | --- | --- |
| **DEPRESSION** |  |  |  |  |  |
| HDRS‑17, mean ± SD | 11.9 ± 5.8 | 4.1 ± 4.4 | <0.001*** | 1.50 | — |
| Depressive symptoms (HDRS‑17 ≥ 7), n (%) | 74 (82.2) | 17 (18.5) | <0.001*** | — | 20.41 (9.60–43.42) |
| **ANXIETY** |  |  |  |  |  |
| HAM‑A, mean ± SD | 13.6 ± 7.6 | 4.6 ± 5.6 | <0.001*** | 1.35 | — |
| Anxiety symptoms (HAM‑A ≥ 7), n (%) | 73 (81.1) | 20 (21.7) | <0.001*** | — | 15.46 (7.50–31.87) |
| **COGNITIVE FUNCTION** |  |  |  |  |  |
| MoCA, mean ± SD | 24.1 ± 3.3 | 27.2 ± 2.4 | <0.001*** | −1.10 | — |
| Cognitive impairment (MoCA < 26), n (%) | 60 (66.7) | 12 (13.0) | <0.001*** | — | 13.33 (6.31–28.21) |
| **QUALITY OF LIFE** |  |  |  |  |  |
| EQ‑5D‑5L utility index, mean ± SD | 0.85 ± 0.15 | 0.97 ± 0.08 | <0.001*** | −1.06 | — |
| EQ‑VAS, mean ± SD | 51 ± 17 | 79 ± 13 | <0.001*** | −1.94 | — |

*Abbreviations:* HDRS‑17=Hamilton Depression Rating Scale (17‑item); HAM‑A=Hamilton Anxiety Rating Scale; MoCA=Montreal Cognitive Assessment; EQ‑VAS=EuroQol Visual Analogue Scale.
***p*<0.001 (two‑sided). Utilities derived using the Spanish EQ‑5D‑5L value set.
