# Supplementary material for: Depressive and Anxiety Symptoms Predict Health-Related Quality of Life More Than Cognitive Impairment After Minor Stroke or Transient Ischemic Attack: A Hierarchical Regression Analysis
Source: Research Square preprint supplement (doi:10.21203/rs.3.rs-8864143/v1), 2026-02-19
Supplement: Supplementary file 2 [file eee5e2942634a387da2cbb4c.docx]

## Table S3A-B. Mediation Analysis

Table S3A. Mediation Analysis: Cognitive Function → Depression → Quality of Life (HRQoL)

| **Pathway** | **Coefficient (β)** | **SE** | **95% CI** | **p value** |
| --- | --- | --- | --- | --- |
| **c (Total effect)** | 0.0560 | 0.108 | [−0.123, 0.235] | 0.609 |
| **a (Cognition → Depression)** | −0.0951 | 0.108 | [−0.310, 0.120] | 0.381 |
| **c′ (Direct effect)** | 0.0572 | 0.109 | [−0.130, 0.245] | 0.602 |
| **b (Depression → HRQoL)** | −0.0604 | 0.028 | [−0.116, −0.005] | 0.034* |
| **a×b (Indirect effect)** | −0.0057 | — | [−0.068, 0.047] | — |

**Notes:** Standardized (z‑scored) variables; covariates: age and sex. Indirect effect estimated via bias‑corrected accelerated (BCa) bootstrap with 5,000 resamples. Analyses were performed using PROCESS v3.5 (SPSS v29). Two‑sided tests, *p*<0.05 marked with *.

Table S3B. Mediation Analysis: Cognitive Function → Anxiety → Quality of Life (HRQoL)

| **Pathway** | **Coefficient (β)** | **SE** | **95% CI** | **p value** |
| --- | --- | --- | --- | --- |
| **c (Total effect)** | 0.0560 | 0.108 | [−0.123, 0.235] | 0.609 |
| **a (Cognition → Anxiety)** | −0.1272 | 0.107 | [−0.343, 0.088] | 0.239 |
| **c′ (Direct effect)** | 0.0787 | 0.110 | [−0.145, 0.303] | 0.476 |
| **b (Anxiety → HRQoL)** | −0.0620 | 0.030 | [−0.121, −0.003] | 0.041* |
| **a×b (Indirect effect)** | 0.0079 | — | [−0.046, 0.078] | — |

**Notes:** Standardized (z‑scored) variables; covariates: age and sex. Indirect effect estimated via bias‑corrected accelerated (BCa) bootstrap with 5,000 resamples. Analyses run with PROCESS v3.5 (SPSS v29). Two‑sided tests; *p*<0.05 marked with *. NS = non‑significant.
