# Supplementary material for: Depressive and Anxiety Symptoms Predict Health-Related Quality of Life More Than Cognitive Impairment After Minor Stroke or Transient Ischemic Attack: A Hierarchical Regression Analysis
Source: Research Square preprint supplement (doi:10.21203/rs.3.rs-8864143/v1), 2026-02-19
Supplement: Supplementary file 3 [file f85559ae0c0b12c0a0fdb7cf.docx]

# Table S2: Correlation matrix among cases (n=90)

| **Variable pair** | **r (type)** | **p value** | **q (FDR)** | **Strength** |
| --- | --- | --- | --- | --- |
| MoCA ↔ HDRS‑17 | −0.146 (Pearson) | 0.162 | 0.216 | Weak / NS |
| MoCA ↔ HAM‑A | −0.170 (Pearson) | 0.112 | 0.186 | Weak / NS |
| HDRS‑17 ↔ HAM‑A | 0.681 (Pearson) | <0.001*** | <0.001 | **Strong** |
| HDRS‑17 ↔ EQ‑5D‑5L | −0.612 (Spearman) | <0.001*** | <0.001 | **Strong** |
| HAM‑A ↔ EQ‑5D‑5L | −0.625 (Spearman) | <0.001*** | <0.001 | **Strong** |
| MoCA ↔ EQ‑5D‑5L | 0.092 (Spearman) | 0.372 | 0.372 | Negligible |
| Age ↔ HDRS‑17 | −0.103 (Pearson) | 0.314 | 0.357 | Weak / NS |
| Age ↔ MoCA | −0.081 (Pearson) | 0.445 | 0.445 | Weak / NS |
| DWI lesion (0/1) ↔ HDRS‑17 | 0.137 (Point‑biserial) | 0.190 | 0.216 | Weak / NS |
| DWI lesion (0/1) ↔ MoCA | −0.191 (Point‑biserial) | 0.078 | 0.117 | Weak / trend |

Correlation method chosen by variable scale/distribution (Pearson for approximately continuous/normal, Spearman for ordinal/non‑normal, point‑biserial for binary–continuous). False discovery rate (FDR) controlled within this table using Benjamini–Hochberg.

**Abbreviations:** HDRS‑17=Hamilton Depression Rating Scale (17‑item); HAM‑A=Hamilton Anxiety Rating Scale; MoCA=Montreal Cognitive Assessment; EQ‑5D‑5L=EuroQol five‑dimension five‑level index; DWI=diffusion‑weighted imaging; NS=non‑significant.
